# Supplementary material
Source: Springer Nature journal article supplement (https://www.springermedizin.de/resource/supplementary/12967_2013_1702_MOESM7_ESM.pdf/9575148)

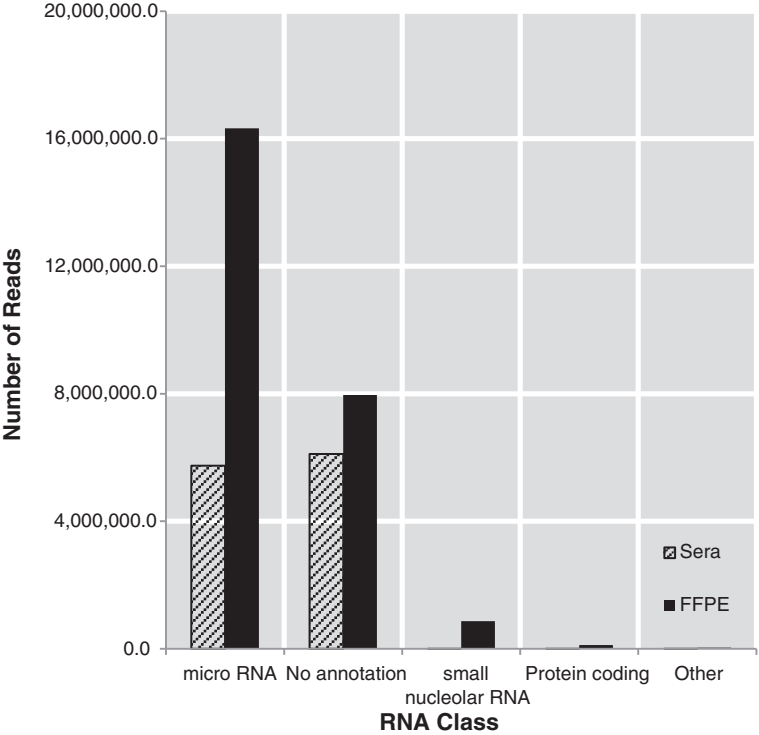

Supplement: MOESM7 [file 9575148]
